# Supplementary material
Source: MDPI journal article supplement (https://www.mdpi.com/2311-5637/8/8/403)
Supplement: s1 [file s1]

**Table S1.**

Number of sequence reads for each sample

|                  | Control    | 2H         | 4H         |
|------------------|------------|------------|------------|
| rRNA reads       | 199,382    | 3,319,783  | 196,865    |
| (%)              | 0.65       | 10.85      | 0.61       |
| mRNA reads       | 24,701,434 | 22,681,496 | 26,442,084 |
| (%)              | 80.19      | 74.16      | 82.44      |
| Intergenic reads | 3,854,652  | 2,779,801  | 3,735,109  |
| (%)              | 12.51      | 9.09       | 11.65      |
| Unmapped reads   | 838,262    | 772,340    | 746,249    |
| (%)              | 2.72       | 2.53       | 2.33       |
| QC dropped reads | 164,029    | 112,670    | 86,151     |
| (%)              | 0.53       | 0.37       | 0.27       |
| Total reads      | 29,757,759 | 29,666,090 | 31,206,458 |
| (%)              | 96.6       | 97.0       | 97.3       |

**Table S3.**

Comparison of normalization methods for RNA-Seq data.

| Coefficients of variation<br>(CV) | Normalization method |        |        |
|-----------------------------------|----------------------|--------|--------|
|                                   | RPKM                 | RLE    | TMM    |
|                                   | 0.3932               | 0.3693 | 0.3685 |

**Table S4.**

Primers for quantitative real-time PCR.

| Gene         | Gene locus    | Oligonucleotide             |                             | Size<br>(bp) | Reference            |
|--------------|---------------|-----------------------------|-----------------------------|--------------|----------------------|
|              |               | Forward (5'→3')             | Reverse (5'→3')             |              |                      |
| 16S rRNA     | AWC34_RS01040 | ACT CCT ACG GGA GGC AGC AGT | TAT TAC CGC GGC TGC TGG C   | 198          | Clifford et al. 2012 |
| <i>gbsB</i>  | AWC34_RS11515 | GAG CAT GTG GTG CTT TCG TAC | GGT GCA GCA GCA TCT AAC CAC | 133          | This study           |
| <i>gbsA</i>  | AWC34_RS11520 | CTG GAC CCA TTT CGG TTT CTG | CCA AGT ATG TTC TGC TGG CGC | 134          | This study           |
| <i>opuCA</i> | AWC34_RS10330 | GTA TCT CTC GTA ATC GGG TC  | CTC AAT TAT CTG GGG GAC AGC | 118          | This study           |
| <i>opuCB</i> | AWC34_RS10325 | GCT GGC ACA AGT ATG GGA ATG | CAT AAC TTG CTA GCG TCG CCC | 136          | This study           |
| <i>opuCC</i> | AWC34_RS10320 | GTA CCC CTC AAT ACG TCC ATC | GGT TAC ATC GTG AAG GTG ACG | 134          | This study           |
| <i>opuCD</i> | AWC34_RS10315 | GTC ACC TAA AGT TGG TGC TCC | GGG TAT GAC ACG AAA CCA AG  | 145          | This study           |
| <i>opuD1</i> | AWC34_RS05465 | GGT GCG GCT GAA CCA ATG GC  | GCG CTA ATG CTA CTA CGC C   | 145          | This study           |
| <i>opuD2</i> | AWC34_RS09135 | GCC CCA ACT GAC TTT GAC     | CGG AAA CAG CGA CCT TTG C   | 182          | This study           |
| <i>opuD3</i> | AWC34_RS10865 | GGA CTC CAG CTC ATC CAC CAG | GAC AAG TGG CAC AGG AGA C   | 135          | This study           |
| <i>opuD4</i> | AWC34_RS10935 | CAG CAG GCT TAG GTG TAG GG  | GCC CAT TGC GAC TCT TGC AG  | 125          | This study           |
| <i>opuD5</i> | AWC34_RS11530 | CTG TGC TGG TAT TGC TTC AG  | CGC TGG CAG TAC GAA TGT TGC | 175          | This study           |
| <i>abgT</i>  | AWC34_RS10400 | CAT CCG GGC ACA GGC GAT ACG | GCT ACC CCA ATA CCA AGC ATG | 146          | This study           |
| <i>putP</i>  | AWC34_RS10580 | GAT TAT GGG ACT ACC TGG GG  | GGT AGC GTA ATG GCA TCC CC  | 153          | This study           |

**Table S5.**

Differential gene expression related to salt stress.

| Gene locus                             | Gene | E.C. No.  | Log2(Fold change) |        | COG | Product                                                                      |
|----------------------------------------|------|-----------|-------------------|--------|-----|------------------------------------------------------------------------------|
|                                        |      |           | 2H/CON            | 4H/CON |     |                                                                              |
| UP regulated                           |      |           |                   |        |     |                                                                              |
| C: Energy production and conversion    |      |           |                   |        |     |                                                                              |
| AWC34_RS05470                          | -    | 4.2.1.3   | 0.59              | 2.26   | C   | Aconitate hydratase AcnA                                                     |
| AWC34_RS07130                          | -    | 2.3.3.1   | 0.33              | 2.18   | C   | Citrate synthase                                                             |
| AWC34_RS09600                          | -    | 1.1.1.290 | -0.3              | 2.06   | C   | 2-hydroxyacid dehydrogenase                                                  |
| AWC34_RS10110                          | -    | 1.7.99.4  | 2.24              | -3.98  | C   | Nitrate reductase subunit alpha                                              |
| AWC34_RS11520                          | -    | 1.2.1.3   | 4.21              | 2.34   | C   | Betaine-aldehyde dehydrogenase                                               |
| E: Amino acid transport and metabolism |      |           |                   |        |     |                                                                              |
| AWC34_RS00290                          | -    | 4.4.1.8   | 3.37              | 0.01   | E   | PLP-dependent transferase                                                    |
| AWC34_RS00295                          | -    | 2.5.1.48  | 3.52              | -0.62  | E   | Cystathionine gamma-synthase                                                 |
| AWC34_RS00495                          | -    | 3.5.1.32  | -0.93             | 2.06   | E   | Amidohydrolase                                                               |
| AWC34_RS01390                          | -    | 2.3.1.30  | 2.11              | 2.31   | E   | Serine O-acetyltransferase                                                   |
| AWC34_RS01730                          | -    | 3.5.3.11  | 1.91              | 2.21   | E   | Agmatinase                                                                   |
| AWC34_RS02825                          | -    | -         | 2.12              | 0.97   | E   | ABC transporter ATP-binding protein                                          |
| AWC34_RS03630                          | -    | 2.6.1.17  | 1.93              | 2.11   | E   | Ornithine--oxo-acid transaminase                                             |
| AWC34_RS03660                          | -    | 4.3.2.1   | 0.45              | 2.56   | E   | Argininosuccinate lyase                                                      |
| AWC34_RS03665                          | -    | 6.3.4.5   | 0.63              | 2.57   | E   | Argininosuccinate synthase                                                   |
| AWC34_RS05600                          | -    | 4.1.3.27  | 1.68              | 2.08   | E   | Anthranilate synthase component I                                            |
| AWC34_RS05610                          | -    | 2.4.2.18  | 1.71              | 2.07   | E   | Anthranilate phosphoribosyltransferase                                       |
| AWC34_RS05615                          | -    | 4.1.1.48  | 1.61              | 2.42   | E   | Indole-3-glycerol phosphate synthase TrpC                                    |
| AWC34_RS06225                          | -    | 1.5.1.2   | 0.43              | 2.24   | E   | Pyrroline-5-carboxylate reductase                                            |
| AWC34_RS07515                          | -    | -         | 0.13              | 2.32   | E   | Osmoprotectant ABC transporter substrate-binding protein                     |
| AWC34_RS08450                          | -    | 4.2.1.9   | 2.1               | 0      | E   | Dihydroxy-acid dehydratase                                                   |
| AWC34_RS08455                          | -    | 2.2.1.6   | 2.2               | 0.15   | E   | Acetolactate synthase, large subunit, biosynthetic type                      |
| AWC34_RS08835                          | -    | -         | 2.22              | -0.04  | E   | Amidohydrolase                                                               |
| AWC34_RS10580                          | -    | -         | 1.48              | 4.61   | E   | Sodium/proline symporter PutP                                                |
| AWC34_RS11425                          | -    | 2.7.2.8   | 1.23              | 9.08   | E   | Acetylglutamate kinase                                                       |
| AWC34_RS11430                          | -    | 2.3.1.35  | 1.04              | 8.94   | E   | Bifunctional glutamate N-acetyltransferase/amino-acid acetyltransferase ArgJ |
| AWC34_RS11435                          | -    | 1.2.1.38  | 0.82              | 8.64   | E   | N-acetyl-gamma-glutamyl-phosphate reductase                                  |
| AWC34_RS11440                          | -    | 2.6.1.13  | 0.52              | 7.91   | E   | Ornithine--oxo-acid transaminase                                             |
| AWC34_RS11515                          | -    | 1.1.99.1  | 4.41              | 1.3    | E   | Choline dehydrogenase                                                        |
| AWC34_RS12770                          | -    | 4.3.1.3   | 0.84              | 3.01   | E   | Histidine ammonia-lyase                                                      |
| AWC34_RS10530                          | -    | -         | 3.23              | 0.34   | EG  | Gluconate permease                                                           |
| AWC34_RS03780                          | -    | -         | 2.74              | 1.84   | EP  | ABC transporter ATP-binding protein                                          |
| AWC34_RS03785                          | -    | -         | 2.34              | 1.27   | EP  | ABC transporter ATP-binding protein                                          |
| F: Nucleotide transport and metabolism |      |           |                   |        |     |                                                                              |
| AWC34_RS00805                          | -    | -         | 0.72              | 2.33   | F   | Purine permease                                                              |
| AWC34_RS04125                          | -    | 6.3.4.18  | 3.14              | 1.69   | F   | 5-(carboxyamino)imidazole ribonucleotide synthase                            |
| AWC34_RS04130                          | -    | 6.3.2.6   | 3.86              | 2.19   | F   | Phosphoribosylaminoimidazolesuccinocarboxamidesynthase                       |
| AWC34_RS04135                          | -    | 6.3.5.3   | 4.15              | 2.06   | F   | Phosphoribosylformylglycinamidine synthase subunit PurS                      |
| AWC34_RS04140                          | -    | 6.3.5.3   | 3.76              | 2.07   | F   | Phosphoribosylformylglycinamidine synthase I                                 |
| AWC34_RS04145                          | -    | 6.3.5.3   | 2.89              | 2.02   | F   | Phosphoribosylformylglycinamidine synthase subunit PurL                      |

|                                                                  |             |           |       |       |    |                                                                         |
|------------------------------------------------------------------|-------------|-----------|-------|-------|----|-------------------------------------------------------------------------|
| AWC34_RS04150                                                    | -           | 2.4.2.14  | 2.3   | 1.84  | F  | Amidophosphoribosyltransferase                                          |
| AWC34_RS09220                                                    | -           | 2.7.4.3   | 0.76  | 2.16  | F  | Adenylate kinase                                                        |
| AWC34_RS10405                                                    | -           | 3.6.1.40  | 2.19  | -0.14 | FP | Exopolyphosphatase                                                      |
| G: Carbohydrate transport and metabolism                         |             |           |       |       |    |                                                                         |
| AWC34_RS10535                                                    | -           | 2.7.1.12  | 3.93  | 1.2   | G  | Gluconokinase                                                           |
| AWC34_RS10925                                                    | -           | -         | 0.67  | 4.04  | G  | Intercellular adhesion protein C                                        |
| AWC34_RS11470                                                    | -           | -         | 1.03  | 4.94  | G  | MFS transporter                                                         |
| AWC34_RS11630                                                    | -           | 2.7.1.31  | 2.62  | 0.71  | G  | Glycerate kinase                                                        |
| H: Coenzyme transport and metabolism                             |             |           |       |       |    |                                                                         |
| AWC34_RS10130                                                    | -           | 4.99.1.4  | 2.43  | -3.35 | H  | Bifunctional precorrin-2 dehydrogenase/sirohydrochlorin ferrochelataase |
| AWC34_RS10135                                                    | -           | 4.99.1.3  | 2.02  | -3.4  | H  | Hypothetical protein                                                    |
| I: Lipid transport and metabolism                                |             |           |       |       |    |                                                                         |
| AWC34_RS00235                                                    | -           | 2.8.3.1   | 2.74  | 2.42  | I  | Acyl CoA:acetate/3-ketoacid CoA transferase                             |
| AWC34_RS00240                                                    | -           | -         | 2.93  | 3.08  | I  | Long-chain fatty acid--CoA ligase                                       |
| AWC34_RS00245                                                    | -           | 1.3.8.6   | 2.86  | 1.9   | I  | Glutaryl-CoA dehydrogenase                                              |
| AWC34_RS00250                                                    | -           | 1.1.1.35  | 2.03  | 1.52  | I  | 3-hydroxyacyl-CoA dehydrogenase                                         |
| AWC34_RS03260                                                    | -           | -         | 2.06  | 0.89  | I  | Alpha/beta hydrolase                                                    |
| AWC34_RS00135                                                    | -           | -         | 1.04  | 2.43  | IQ | 3-oxoacyl-ACP reductase                                                 |
| AWC34_RS00550                                                    | -           | -         | -0.01 | 4.22  | IQ | KR domain-containing protein                                            |
| J: Translation, ribosomal structure and biogenesis               |             |           |       |       |    |                                                                         |
| AWC34_RS04435                                                    | -           | 6.1.1.20  | 2.49  | 0.88  | J  | Phenylalanine--tRNA ligase subunit alpha                                |
| AWC34_RS06585                                                    | -           | -         | -0.41 | 2.38  | J  | 30S ribosomal protein S21                                               |
| AWC34_RS06840                                                    | -           | 6.1.1.21  | 1.62  | 2.19  | J  | Histidine--tRNA ligase                                                  |
| AWC34_RS09205                                                    | -           | -         | 1.17  | 2.06  | J  | 30S ribosomal protein S13                                               |
| AWC34_RS09210                                                    | -           | -         | 2.08  | 1.55  | J  | 50S ribosomal protein L36                                               |
| AWC34_RS09215                                                    | -           | -         | 0.86  | 2.16  | J  | Translation initiation factor IF-1                                      |
| AWC34_RS09235                                                    | -           | -         | 0.67  | 2.14  | J  | 50S ribosomal protein L30                                               |
| AWC34_RS09240                                                    | -           | -         | 1.01  | 2     | J  | 30S ribosomal protein S5                                                |
| AWC34_RS09255                                                    | -           | -         | 1.08  | 2.13  | J  | 30S ribosomal protein S8                                                |
| AWC34_RS09260                                                    | <i>rpsN</i> | -         | 1.17  | 2.09  | J  | 30S ribosomal protein S14 type Z                                        |
| K: Transcription, regulators                                     |             |           |       |       |    |                                                                         |
| AWC34_RS09195                                                    | -           | 2.7.7.6   | 0.73  | 2     | K  | DNA-directed RNA polymerase subunit alpha                               |
| AWC34_RS10540                                                    | -           | -         | 4.47  | 1.58  | K  | GntR family transcriptional regulator                                   |
| L: Replication, recombination and repair                         |             |           |       |       |    |                                                                         |
| AWC34_RS01955                                                    | -           | 4.1.99.3  | 2.07  | 1.39  | L  | Deoxyribodipyrimidine photo-lyase                                       |
| M: Cell wall/membrane/envelope biogenesis                        |             |           |       |       |    |                                                                         |
| AWC34_RS00605                                                    | -           | -         | -0.44 | 2.82  | M  | Lysozyme                                                                |
| AWC34_RS02505                                                    | -           | -         | 2.51  | 0.31  | M  | NAD(P)-dependent oxidoreductase                                         |
| AWC34_RS08790                                                    | -           | 2.5.1.7   | 2.05  | 1.17  | M  | UDP-N-acetylglucosamine 1-carboxyvinyltransferase                       |
| AWC34_RS13385                                                    | -           | 2.7.8.12  | -0.06 | 2.46  | M  | CDP-glycerol:glycerophosphateglycerophosphotransferase                  |
| O: Post-translational modification, protein turnover, chaperones |             |           |       |       |    |                                                                         |
| AWC34_RS04970                                                    | -           | 3.4.25.2  | 2.29  | 0.68  | O  | ATP-dependent protease subunit HsIV                                     |
| AWC34_RS10390                                                    | -           | -         | -0.41 | 2.62  | O  | Hypothetical protein                                                    |
| AWC34_RS11070                                                    | -           | 3.4.21.19 | 0.56  | 2.29  | O  | Serine protease                                                         |
| P: Inorganic ion transport and metabolism                        |             |           |       |       |    |                                                                         |
| AWC34_RS03770                                                    | -           | -         | 2.16  | 1.04  | P  | ABC transporter permease                                                |
| AWC34_RS03775                                                    | -           | -         | 2.67  | 1.99  | P  | ABC transporter permease                                                |
| AWC34_RS05465                                                    | -           | -         | 1.88  | 2.31  | P  | BCCT family transporter                                                 |

|                                                                  |             |           |       |       |   |                                                                                 |    |
|------------------------------------------------------------------|-------------|-----------|-------|-------|---|---------------------------------------------------------------------------------|----|
| AWC34_RS09135                                                    | -           | -         | 2.21  | 2.02  | P | BCCT family transporter                                                         |    |
| AWC34_RS10865                                                    | -           | -         | 0.85  | 3.72  | P | BCCT family transporter                                                         |    |
| AWC34_RS11530                                                    | -           | -         | 3.22  | 2.6   | P | BCCT family transporter                                                         |    |
| AWC34_RS11635                                                    | -           | -         | 2.52  | 0.8   | P | 2-keto-3-deoxygluconate permease                                                |    |
| R: General function prediction only                              |             |           |       |       |   |                                                                                 |    |
| AWC34_RS00305                                                    | -           | -         | 0.67  | 3.92  | R | Amidohydrolase                                                                  |    |
| AWC34_RS06690                                                    | -           | -         | 2.06  | 0.88  | R | YqeG family HAD IIIA-type phosphatase                                           |    |
| AWC34_RS11495                                                    | -           | -         | 2.2   | 1.37  | R | N-acetyltransferase                                                             |    |
| S: Function unknown                                              |             |           |       |       |   |                                                                                 |    |
| AWC34_RS00385                                                    | -           | -         | 2.38  | 1.61  | S | Hypothetical protein                                                            |    |
| AWC34_RS02490                                                    | -           | -         | -0.68 | 2.59  | S | Membrane protein                                                                |    |
| AWC34_RS04240                                                    | -           | -         | 2.01  | 0.19  | S | Hypothetical protein                                                            |    |
| AWC34_RS08650                                                    | -           | -         | 0.57  | 2.22  | S | Transglycosylase                                                                |    |
| AWC34_RS09765                                                    | -           | -         | -0.33 | 2.1   | S | Histidine transporter                                                           |    |
| AWC34_RS10220                                                    | -           | -         | 2.15  | 1.51  | S | Hypothetical protein                                                            |    |
| AWC34_RS10550                                                    | -           | -         | 2.09  | 1.06  | S | DUF2188 domain-containing protein                                               |    |
| AWC34_RS11275                                                    | -           | -         | 2.6   | -0.67 | S | Tripartite tricarboxylate transporter substrate binding protein                 |    |
| AWC34_RS11460                                                    | -           | -         | -0.04 | 2.29  | S | ABC transporter permease                                                        |    |
| AWC34_RS11465                                                    | -           | -         | 2.08  | 3.95  | S | Hypothetical protein                                                            |    |
| AWC34_RS11640                                                    | -           | -         | 2.13  | 0.33  | S | DUF2088 domain-containing protein                                               |    |
| AWC34_RS12070                                                    | -           | -         | 3.04  | 1.94  | S | Transglycosylase                                                                |    |
| AWC34_RS12080                                                    | -           | -         | 2.59  | 2.52  | S | Transglycosylase                                                                |    |
| AWC34_RS12440                                                    | -           | -         | -1.03 | 2.26  | S | DUF805 domain-containing protein                                                |    |
| U: Intracellular trafficking, secretion, and vesicular transport |             |           |       |       |   |                                                                                 |    |
| AWC34_RS09225                                                    | -           | -         | 1.15  | 2.04  | U | Preprotein translocase subunit SecY                                             |    |
| V: Defense mechanisms                                            |             |           |       |       |   |                                                                                 |    |
| AWC34_RS09895                                                    | -           | -         | 2.21  | -0.06 | V | ABC transporter ATP-binding protein                                             |    |
| AWC34_RS09900                                                    | -           | -         | 2.32  | -0.24 | V | ABC transporter permease                                                        |    |
| AWC34_RS11450                                                    | -           | -         | 0.28  | 2.73  | V | ABC transporter ATP-binding protein                                             |    |
| AWC34_RS12575                                                    | -           | 3.1.21.3  | 2.05  | 0.76  | V | Type I restriction endonuclease subunit R                                       |    |
| Others                                                           |             |           |       |       |   |                                                                                 |    |
| AWC34_RS00115                                                    | -           | -         | 0.49  | 2.34  |   | Hypothetical protein                                                            |    |
| AWC34_RS00285                                                    | -           | 2.1.1.10  | 2.37  | -0.1  |   | Bifunctional homocysteine methyltransferase/methylenetetrahydrofolate reductase | S- |
| AWC34_RS00545                                                    | -           | -         | -0.89 | 2.97  |   | Peptide synthetase                                                              |    |
| AWC34_RS00830                                                    | -           | -         | 3.27  | 0.05  |   | Hypothetical protein                                                            |    |
| AWC34_RS01015                                                    | <i>ffs</i>  | -         | -1.8  | 4.33  |   | Signal recognition particle sRNA large type                                     |    |
| AWC34_RS02925                                                    | -           | -         | 2.01  | 0.15  |   | EMYY motif lipoprotein                                                          |    |
| AWC34_RS03155                                                    | <i>ssrA</i> | -         | -0.61 | 3.19  |   | Transfer-messenger RNA                                                          |    |
| AWC34_RS04120                                                    | -           | 5.4.99.18 | 2.23  | 0.99  |   | 5-(carboxyamino)imidazole ribonucleotide mutase                                 |    |
| AWC34_RS06830                                                    | <i>ssrS</i> | -         | 0.54  | 3.14  |   | 6S RNA                                                                          |    |
| AWC34_RS07765                                                    | -           | -         | -0.74 | 2.61  |   | Hypothetical protein                                                            |    |
| AWC34_RS09050                                                    | -           | -         | -0.11 | 2.11  |   | Multidrug resistance protein SepA                                               |    |
| AWC34_RS11455                                                    | -           | -         | 0.2   | 2.29  |   | ABC transporter                                                                 |    |
| AWC34_RS11665                                                    | -           | -         | 0.94  | 2.11  |   | Hypothetical protein                                                            |    |
| AWC34_RS11750                                                    | -           | 3.4.24.75 | 2.63  | 0.48  |   | M23 family peptidase                                                            |    |
| AWC34_RS13095                                                    | -           | -         | -     | 2.55  |   | Butanediol dehydrogenase                                                        |    |
| AWC34_RS13320                                                    | -           | -         | 0.39  | 3.6   |   | D-alanine--poly(phosphoribitol) ligase subunit DltA                             |    |
| AWC34_RS13375                                                    | -           | -         | -0.95 | 2.46  |   | Hypothetical protein                                                            |    |

|                                                    |             |           |       |       |   |                                                                         |
|----------------------------------------------------|-------------|-----------|-------|-------|---|-------------------------------------------------------------------------|
| AWC34_RS13380                                      | -           | -         | 2.34  | 4.82  |   | Putative holin-like toxin                                               |
| AWC34_RS13440                                      | -           | -         | -2.6  | 5.61  |   | Type I toxin-antitoxin system Fst family toxin                          |
| AWC34_RS13455                                      | -           | -         | -2.6  | 5.61  |   | Type I toxin-antitoxin system Fst family toxin                          |
| Down regulated                                     |             |           |       |       |   |                                                                         |
| C: Energy production and conversion                |             |           |       |       |   |                                                                         |
| AWC34_RS10095                                      | -           | 1.7.99.4  | 0.27  | -2.63 | C | Respiratory nitrate reductase subunit gamma                             |
| AWC34_RS10100                                      | -           | -         | 0.5   | -4.36 | C | Nitrate reductase molybdenum cofactor assembly chaperone                |
| AWC34_RS10105                                      | -           | 1.7.99.4  | 1.15  | -4.62 | C | Nitrate reductase subunit beta                                          |
| AWC34_RS10110                                      | -           | 1.7.99.4  | 2.24  | -3.98 | C | Nitrate reductase subunit alpha                                         |
| AWC34_RS10120                                      | -           | 1.7.1.15  | 0.99  | -4.12 | C | Nitrite reductase (NAD(P)H) small subunit                               |
| AWC34_RS10125                                      | -           | 1.7.1.15  | 1.75  | -3.85 | C | Nitrite reductase large subunit                                         |
| E: Amino acid transport and metabolism             |             |           |       |       |   |                                                                         |
| AWC34_RS08230                                      | -           | 4.2.1.51  | 1.15  | -2.32 | E | Prephenate dehydratase                                                  |
| AWC34_RS12105                                      | -           | 3.5.1.18  | -2.28 | -0.74 | E | Hypothetical protein                                                    |
| AWC34_RS13170                                      | -           | 4.1.3.16  | -1.81 | -2.24 | E | 4-hydroxy-tetrahydrodipicolinate synthase                               |
| G: Carbohydrate transport and metabolism           |             |           |       |       |   |                                                                         |
| AWC34_RS00650                                      | <i>celC</i> | 2.7.1.69  | -0.32 | -2.9  | G | PTS lactose/cellobiose transporter subunit IIA                          |
| AWC34_RS05240                                      | -           | -         | 0.23  | -2.27 | G | Aquaporin family protein                                                |
| AWC34_RS10510                                      | -           | 3.2.1.31  | -0.06 | -2.6  | G | Beta-glucuronidase                                                      |
| AWC34_RS10515                                      | -           | -         | 0.74  | -2.57 | G | MFS transporter                                                         |
| AWC34_RS11310                                      | -           | -         | -0.25 | -2.43 | G | MFS transporter                                                         |
| AWC34_RS11355                                      | -           | -         | 0.63  | -2.12 | G | PTS sugar transporter subunit IIC                                       |
| AWC34_RS11395                                      | -           | -         | 0.12  | -2.01 | G | MFS transporter                                                         |
| AWC34_RS12000                                      | -           | -         | -1.96 | -2.47 | G | Sugar porter family MFS transporter                                     |
| AWC34_RS12365                                      | -           | -         | 0.04  | -2.28 | G | Melibiose:sodium transporter MelB                                       |
| H: Coenzyme transport and metabolism               |             |           |       |       |   |                                                                         |
| AWC34_RS10115                                      | -           | 2.1.1.107 | 0.41  | -4.3  | H | Uroporphyrinogen-III C-methyltransferase                                |
| AWC34_RS10130                                      | -           | 4.99.1.4  | 2.43  | -3.35 | H | Bifunctional precorrin-2 dehydrogenase/sirohydrochlorin ferrochelataase |
| AWC34_RS10135                                      | -           | 4.99.1.3  | 2.02  | -3.4  | H | Hypothetical protein                                                    |
| I: Lipid transport and metabolism                  |             |           |       |       |   |                                                                         |
| AWC34_RS03515                                      | -           | 6.1.1.13  | -2.19 | -2.88 | I | D-alanine--poly(phosphoribitol) ligase subunit 2                        |
| AWC34_RS03730                                      | -           | -         | -0.27 | -4.4  | I | Acetyltransferase Putative O-acetyltransferase SACOL0978                |
| J: Translation, ribosomal structure and biogenesis |             |           |       |       |   |                                                                         |
| AWC34_RS04915                                      | -           | -         | -2.28 | 0.55  | J | 50S ribosomal protein L19                                               |
| AWC34_RS05275                                      | -           | 2.5.1.75  | -1.38 | -2.12 | J | TRNA (adenosine(37)-N6)-dimethylallyltransferase MiaA                   |
| K: Transcription, regulators                       |             |           |       |       |   |                                                                         |
| AWC34_RS01665                                      | -           | -         | -0.52 | -2.36 | K | LacI family DNA-binding transcriptional regulator                       |
| AWC34_RS03960                                      | -           | -         | -1.82 | -2.02 | K | Competence protein ComK                                                 |
| AWC34_RS04045                                      | -           | -         | -2.51 | -4.3  | K | MarR family transcriptional regulator                                   |
| AWC34_RS05505                                      | -           | -         | -0.79 | -2.25 | K | Transcription antiterminator                                            |
| AWC34_RS06615                                      | -           | -         | -2.3  | -1.27 | K | Heat-inducible transcription repressor HrcA                             |
| AWC34_RS10770                                      | -           | -         | -0.83 | -2.16 | K | N-acetyltransferase                                                     |
| AWC34_RS12400                                      | -           | -         | -1.71 | -2.05 | K | MerR family DNA-binding transcriptional regulator                       |
| AWC34_RS12945                                      | -           | -         | -2.72 | -1.51 | K | ArsR family transcriptional regulator                                   |
| AWC34_RS13310                                      | -           | -         | -2.38 | 0.19  | K | FCD domain-containing protein                                           |
| L: Replication, recombination and repair           |             |           |       |       |   |                                                                         |
| AWC34_RS05330                                      | -           | 3.1.31.1  | -2.18 | -0.79 | L | Thermonuclease                                                          |
| AWC34_RS11485                                      | -           | -         | -0.97 | -2.66 | L | Hypothetical protein                                                    |

|                                                                  |   |           |       |       |   |                                                                 |
|------------------------------------------------------------------|---|-----------|-------|-------|---|-----------------------------------------------------------------|
| AWC34_RS13220                                                    | - | -         | -2.05 | -0.9  | L | Recombinase family protein                                      |
| AWC34_RS13295                                                    | - | -         | -1.58 | -2.13 | L | Protein rep                                                     |
| AWC34_RS13445                                                    | - | -         | -0.61 | -2    | L | Replication protein                                             |
| M: Cell wall/membrane/envelope biogenesis                        |   |           |       |       |   |                                                                 |
| AWC34_RS03510                                                    | - | -         | -1.78 | -2.63 | M | D-alanyl-lipoteichoic acid biosynthesis protein DltB            |
| AWC34_RS03520                                                    | - | -         | -2.53 | -3.21 | M | D-alanyl-lipoteichoic acid biosynthesis protein DltD            |
| AWC34_RS04425                                                    | - | -         | 1.54  | -2.28 | M | M23 family peptidase                                            |
| AWC34_RS07615                                                    | - | 2.7.8.12  | -0.37 | -3.54 | M | Glycosyltransferase family 2 protein                            |
| AWC34_RS12225                                                    | - | 2.4.1.83  | -0.47 | -2.97 | M | Glycosyltransferase                                             |
| O: Post-translational modification, protein turnover, chaperones |   |           |       |       |   |                                                                 |
| AWC34_RS03075                                                    | - | 3.4.21.92 | -2.82 | -1.02 | O | ATP-dependent Clp protease proteolytic subunit                  |
| AWC34_RS03740                                                    | - | -         | -2.71 | -1.44 | O | ATP-dependent chaperone ClpB                                    |
| AWC34_RS06605                                                    | - | -         | -2.04 | -0.41 | O | Molecular chaperone DnaK                                        |
| AWC34_RS06610                                                    | - | -         | -2.12 | -0.97 | O | Nucleotide exchange factor GrpE                                 |
| AWC34_RS08340                                                    | - | -         | -2.52 | -1    | O | Chaperonin GroEL                                                |
| AWC34_RS08345                                                    | - | -         | -2.02 | -1.79 | O | Co-chaperone GroES                                              |
| AWC34_RS10070                                                    | - | -         | -2.81 | -0.46 | O | Hsp20/alpha crystallin family protein                           |
| AWC34_RS11770                                                    | - | -         | -1.3  | -2.88 | O | Hypothetical protein                                            |
| P: Inorganic ion transport and metabolism                        |   |           |       |       |   |                                                                 |
| AWC34_RS00225                                                    | - | -         | -1.09 | -2.94 | P | Ferrichrome ABC transporter substrate-binding protein           |
| AWC34_RS00695                                                    | - | -         | -1.38 | -5.78 | P | QacE family quaternary ammonium compound efflux SMR transporter |
| AWC34_RS02900                                                    | - | -         | -2.77 | -1.38 | P | Iron ABC transporter substrate-binding protein                  |
| AWC34_RS03405                                                    | - | -         | -2.15 | -0.12 | P | HlyC/CorC family transporter                                    |
| AWC34_RS09510                                                    | - | -         | -3.55 | -2.1  | P | Ferrichrome ABC transporter substrate-binding protein           |
| AWC34_RS10075                                                    | - | -         | -0.49 | -3.38 | P | NarK/NasA family nitrate transporter                            |
| AWC34_RS12090                                                    | - | -         | 0.38  | -3.08 | P | Membrane protein                                                |
| AWC34_RS12315                                                    | - | -         | -2.58 | -2.44 | P | Iron-siderophore ABC transporter substrate-binding protein      |
| AWC34_RS12320                                                    | - | -         | -2.02 | -1.26 | P | Iron ABC transporter permease                                   |
| AWC34_RS12325                                                    | - | -         | -2.9  | -1.53 | P | Iron ABC transporter permease                                   |
| AWC34_RS12950                                                    | - | -         | -2.09 | -1.86 | P | Arsenical efflux pump membrane protein ArsB                     |
| Q: Secondary metabolites biosynthesis, transport and catabolism  |   |           |       |       |   |                                                                 |
| AWC34_RS03505                                                    | - | 6.1.1.13  | -0.74 | -2.88 | Q | D-alanine--poly(phosphoribitol) ligase subunit 1                |
| R: General function prediction only                              |   |           |       |       |   |                                                                 |
| AWC34_RS03560                                                    | - | -         | -2.47 | -0.53 | R | Sodium:proton antiporter                                        |
| AWC34_RS05565                                                    | - | 5.3.2.6   | -1.35 | -2.78 | R | 4-oxalocrotonate tautomerase                                    |
| AWC34_RS08815                                                    | - | -         | 0.32  | -2.28 | R | VOC family protein                                              |
| AWC34_RS09940                                                    | - | -         | 0.35  | -2.18 | R | N-acetyltransferase                                             |
| AWC34_RS10205                                                    | - | -         | -0.47 | -2.92 | R | Lantibiotic ABC transporter ATP-binding protein                 |
| AWC34_RS11200                                                    | - | -         | -0.94 | -2.53 | R | Thioesterase                                                    |
| AWC34_RS12060                                                    | - | -         | -0.64 | -2.64 | R | HAD family hydrolase                                            |
| AWC34_RS12250                                                    | - | -         | -0.27 | -2.05 | R | Serine/threonine protein phosphatase                            |
| S: Function unknown                                              |   |           |       |       |   |                                                                 |
| AWC34_RS00460                                                    | - | -         | -0.82 | -2.42 | S | Hypothetical protein                                            |
| AWC34_RS00465                                                    | - | -         | -1.11 | -3.28 | S | Hypothetical protein                                            |
| AWC34_RS00580                                                    | - | -         | 0.91  | -2.27 | S | DUF2309 domain-containing protein                               |
| AWC34_RS00690                                                    | - | -         | -1.25 | -3.59 | S | Multidrug resistance protein SMR                                |
| AWC34_RS01885                                                    | - | -         | -0.7  | -2.11 | S | Metal-sensitive transcriptional regulator                       |
| AWC34_RS02310                                                    | - | -         | -0.51 | -2.16 | S | HlyD family secretion protein                                   |



|                                   |   |           |       |       |   |                                                            |
|-----------------------------------|---|-----------|-------|-------|---|------------------------------------------------------------|
| AWC34_RS02965                     | - | 3.4.13.9  | -1.06 | -2.12 | S | YigZ family protein                                        |
| AWC34_RS03170                     | - | -         | -2.29 | -0.51 | S | DUF418 domain-containing protein                           |
| AWC34_RS04105                     | - | 3.4.24.28 | -0.2  | -2.41 | S | DUF5011 domain-containing protein                          |
| AWC34_RS04450                     | - | -         | 0.9   | -2.07 | S | Cell division protein ZapA                                 |
| AWC34_RS05480                     | - | -         | -2.46 | -0.57 | S | Hypothetical protein                                       |
| AWC34_RS06450                     | - | -         | -3.02 | 0.49  | S | DUF910 domain-containing protein                           |
| AWC34_RS07395                     | - | -         | -2.35 | -0.39 | S | Hypothetical protein                                       |
| AWC34_RS07695                     | - | -         | -2.01 | 1.09  | S | Signal transduction protein TRAP                           |
| AWC34_RS08290                     | - | -         | -2    | -0.1  | S | Thioredoxin family protein                                 |
| AWC34_RS09075                     | - | -         | -2.11 | -1.39 | S | Hypothetical protein                                       |
| AWC34_RS10090                     | - | -         | 0.13  | -2.13 | S | GAF domain-containing protein                              |
| AWC34_RS11080                     | - | -         | -2.1  | -1.15 | S | DUF896 family protein                                      |
| AWC34_RS12220                     | - | -         | -0.99 | -3.25 | S | Hypothetical protein                                       |
| AWC34_RS12620                     | - | -         | -1.15 | -4.06 | S | Hypothetical protein                                       |
| AWC34_RS12670                     | - | 2.1.1.177 | 0.67  | -2.22 | S | 23S rRNA (pseudouridine(1915)-N(3))-methyltransferase RlmH |
| AWC34_RS12825                     | - | -         | -2.59 | -0.84 | S | Sulfite exporter TauE/SafE family protein                  |
| AWC34_RS12900                     | - | -         | -0.43 | -2.87 | S | Replication initiator protein                              |
| AWC34_RS13005                     | - | -         | -2.59 | -0.84 | S | Sulfite exporter TauE/SafE family protein                  |
| AWC34_RS13010                     | - | -         | -2.23 | -1.03 | S | Metal-sensitive transcriptional regulator                  |
| AWC34_RS13140                     | - | -         | 0.36  | -2    | S | Replication protein                                        |
| AWC34_RS13270                     | - | -         | 0.36  | -2    | S | Replication protein                                        |
| AWC34_RS13305                     | - | -         | -2.86 | -2.16 | S | FeoB-associated Cys-rich membrane protein                  |
| T: Signal transduction mechanisms |   |           |       |       |   |                                                            |
| AWC34_RS03985                     | - | 1.20.4.1  | -2.38 | -1.54 | T | Arsenate reductase (thioredoxin)                           |
| AWC34_RS05280                     | - | -         | -2.71 | -1.95 | T | RNA chaperone Hfq                                          |
| AWC34_RS07180                     | - | -         | -2.19 | -1.32 | T | Universal stress protein                                   |
| AWC34_RS08370                     | - | -         | -3.39 | -1.57 | T | Accessory gene regulator B                                 |
| AWC34_RS08380                     | - | -         | -2.1  | -0.76 | T | GHKL domain-containing protein                             |
| AWC34_RS12955                     | - | 1.20.4.1  | -2.79 | -1.67 | T | Protein ArsC 2                                             |
| Others                            |   |           |       |       |   |                                                            |
| AWC34_RS00055                     | - | 2.7.8.12  | -3    | -2.38 |   | Hypothetical protein                                       |
| AWC34_RS00060                     | - | -         | -1.76 | -2.15 |   | Ferrous iron transport protein B                           |
| AWC34_RS00065                     | - | -         | -1.69 | -2.48 |   | Ferrous iron transporter A                                 |
| AWC34_RS00835                     | - | -         | 0.2   | -2.04 |   | Hypothetical protein                                       |
| AWC34_RS02755                     | - | -         | -2.03 | 0.1   |   | Hypothetical protein                                       |
| AWC34_RS03165                     | - | -         | -3.08 | -1.33 |   | Hypothetical protein                                       |
| AWC34_RS03205                     | - | -         | -2.4  | 0.4   |   | Hypothetical protein                                       |
| AWC34_RS03225                     | - | -         | -1    | -2.66 |   | Hypothetical protein                                       |
| AWC34_RS03240                     | - | -         | -0.78 | -2.65 |   | Hypothetical protein                                       |
| AWC34_RS03295                     | - | -         | -2.6  | -2.98 |   | Hypothetical protein                                       |
| AWC34_RS03500                     | - | -         | -1.36 | -3.82 |   | Teichoic acid D-Ala incorporation-associated protein DltX  |
| AWC34_RS04245                     | - | -         | -2.13 | -0.83 |   | Hypothetical protein                                       |
| AWC34_RS04325                     | - | -         | -2.2  | -1.1  |   | Hypothetical protein                                       |
| AWC34_RS04540                     | - | -         | -8.5  | -1.63 |   | Beta-class phenol-soluble modulins                         |
| AWC34_RS04545                     | - | -         | -6.1  | -1.98 |   | Beta-class phenol-soluble modulins                         |
| AWC34_RS04550                     | - | -         | -5.37 | -1.95 |   | Beta-class phenol-soluble modulins                         |
| AWC34_RS05325                     | - | -         | -2.23 | -0.75 |   | Hypothetical protein                                       |
| AWC34_RS05375                     | - | -         | -0.28 | -2.39 |   | Hypothetical protein                                       |

|               |             |          |       |       |                                                           |
|---------------|-------------|----------|-------|-------|-----------------------------------------------------------|
| AWC34_RS05800 | -           | -        | -2.3  | -0.72 | Mid2-like cell wall stress sensor domain protein          |
| AWC34_RS05980 | <i>rnpB</i> | -        | -2.38 | 0.01  | RNase P RNA component class B                             |
| AWC34_RS06410 | -           | -        | -1.78 | -2.66 | Hypothetical protein                                      |
| AWC34_RS06640 | -           | -        | -0.96 | -2.04 | DNA internalization-related competence protein ComEC/Rec2 |
| AWC34_RS06935 | -           | -        | -1.86 | -2.24 | DUF4930 domain-containing protein                         |
| AWC34_RS07620 | -           | -        | -0.36 | -2.56 | Hypothetical protein                                      |
| AWC34_RS08375 | -           | -        | -2.6  | -1.46 | Cyclic lactone autoinducer peptide                        |
| AWC34_RS09405 | -           | -        | -1.78 | -3.49 | MarR family transcriptional regulator                     |
| AWC34_RS09615 | -           | -        | -1.41 | -2.29 | Hypothetical protein                                      |
| AWC34_RS10080 | -           | -        | -0.52 | -2.02 | DNA-binding response regulator                            |
| AWC34_RS10905 | -           | -        | 0.51  | -2.21 | Hypothetical protein                                      |
| AWC34_RS10970 | -           | -        | -0.82 | -2.18 | Lactococcin 972 family bacteriocin                        |
| AWC34_RS11995 | -           | -        | -3.77 | -2.64 | Beta-class phenol-soluble modulins                        |
| AWC34_RS12065 | -           | -        | -0.54 | -3.11 | Hypothetical protein                                      |
| AWC34_RS12330 | -           | -        | -2.82 | -2.03 | Hypothetical protein                                      |
| AWC34_RS12345 | -           | -        | -1.16 | -2.51 | Hypothetical protein                                      |
| AWC34_RS12590 | -           | -        | -3.27 | -3.02 | Hypothetical protein                                      |
| AWC34_RS12625 | -           | -        | -0.15 | -2.02 | Hypothetical protein                                      |
| AWC34_RS12840 | -           | 3.1.2.6  | -3.37 | -1.33 | MBL fold metallo-hydrolase                                |
| AWC34_RS12860 | -           | -        | -2.01 | 0.11  | Hypothetical protein                                      |
| AWC34_RS13015 | -           | -        | -2.69 | -1.37 | Sulfurtransferase                                         |
| AWC34_RS13020 | -           | 3.1.2.6  | -3.37 | -1.33 | MBL fold metallo-hydrolase                                |
| AWC34_RS13040 | -           | -        | -2.01 | 0.11  | Hypothetical protein                                      |
| AWC34_RS13165 | -           | 1.2.1.88 | -2.4  | -2.92 | Betaine-aldehyde dehydrogenase                            |
| AWC34_RS13360 | -           | -        | -1.78 | -3.24 | Putative holin-like toxin                                 |
| AWC34_RS13365 | -           | -        | -0.33 | -2.74 | Hypothetical protein                                      |
| AWC34_RS13390 | -           | -        | -0.22 | -3.15 | Hypothetical protein                                      |
| AWC34_RS13415 | -           | -        | -2.78 | 0.15  | Hypothetical protein                                      |
| AWC34_RS13435 | -           | -        | -3.64 | -1.14 | Hypothetical protein                                      |
| AWC34_RS13440 | -           | -        | -2.6  | 5.61  | Type I toxin-antitoxin system Fst family toxin            |
| AWC34_RS13455 | -           | -        | -2.6  | 5.61  | Type I toxin-antitoxin system Fst family toxin            |

**Table S6.**

DEGs on exposure to 7% NaCl for both 2 and 4 h.

| Gene locus    | E.C. No. | Log2(Fold change) |        | COG | Product                                                    |
|---------------|----------|-------------------|--------|-----|------------------------------------------------------------|
|               |          | 2H/CON            | 4H/CON |     |                                                            |
| AWC34_RS00235 | 2.8.3.1  | 2.74              | 2.42   | I   | Acyl CoA:acetate/3-ketoacid CoA transferase                |
| AWC34_RS00240 | -        | 2.93              | 3.08   | I   | Long-chain fatty acid--CoA ligase                          |
| AWC34_RS01390 | 2.3.1.30 | 2.11              | 2.31   | E   | Serine O-acetyltransferase                                 |
| AWC34_RS04130 | 6.3.2.6  | 3.86              | 2.19   | F   | Phosphoribosylaminoimidazole succino carboxamide esynthase |
| AWC34_RS04135 | 6.3.5.3  | 4.15              | 2.06   | F   | Phosphoribosylformylglycinamide synthase subunit PurS      |
| AWC34_RS04140 | 6.3.5.3  | 3.76              | 2.07   | F   | Phosphoribosylformylglycinamide synthase I                 |
| AWC34_RS04145 | 6.3.5.3  | 2.89              | 2.02   | F   | Phosphoribosylformylglycinamide synthase subunit PurL      |
| AWC34_RS09135 | -        | 2.21              | 2.02   | P   | BCCT family transporter                                    |
| AWC34_RS11465 | -        | 2.08              | 3.95   | S   | Hypothetical protein                                       |
| AWC34_RS11520 | 1.2.1.3  | 4.21              | 2.34   | C   | Betaine-aldehyde dehydrogenase                             |
| AWC34_RS11530 | -        | 3.22              | 2.6    | P   | BCCT family transporter                                    |
| AWC34_RS12080 | -        | 2.59              | 2.52   | S   | Transglycosylase                                           |
| AWC34_RS13380 | -        | 2.34              | 4.82   |     | Putative holin-like toxin                                  |
| AWC34_RS00055 | 2.7.8.12 | -3                | -2.38  |     | Hypothetical protein                                       |
| AWC34_RS03295 | -        | -2.6              | -2.98  |     | Hypothetical protein                                       |
| AWC34_RS03515 | 6.1.1.13 | -2.19             | -2.88  | I   | D-alanine--poly(phosphoribitol) ligase subunit 2           |
| AWC34_RS03520 | -        | -2.53             | -3.21  | M   | D-alanyl-lipoteichoic acid biosynthesis protein DltD       |
| AWC34_RS04045 | -        | -2.51             | -4.3   | K   | MarR family transcriptional regulator                      |
| AWC34_RS09510 | -        | -3.55             | -2.1   | P   | Ferrichrome ABC transporter substrate-binding protein      |
| AWC34_RS11995 | -        | -3.77             | -2.64  |     | Beta-class phenol-soluble modulins                         |
| AWC34_RS12315 | -        | -2.58             | -2.44  | P   | Iron-siderophore ABC transporter substrate-binding protein |
| AWC34_RS12330 | -        | -2.82             | -2.03  |     | Hypothetical protein                                       |
| AWC34_RS12590 | -        | -3.27             | -3.02  |     | Hypothetical protein                                       |
| AWC34_RS13165 | 1.2.1.88 | -2.4              | -2.92  |     | Betaine-aldehyde dehydrogenase                             |
| AWC34_RS13305 | -        | -2.86             | -2.16  | S   | FeoB-associated Cys-rich membrane protein                  |
